# Formalin Tissue Fixation Biases Myelin-Sensitive MRI

Alan C. Seifert<sup>1,2,3,\*</sup>, Melissa Umphlett<sup>4</sup>, Marco Hefti<sup>4</sup>, Mary Fowkes<sup>4</sup>, and Junqian Xu<sup>1,2,3,5</sup>

<sup>1</sup>Translational and Molecular Imaging Institute, Icahn School of Medicine at Mount Sinai,  
New York, NY USA

<sup>2</sup>Department of Radiology, Icahn School of Medicine at Mount Sinai, New York, NY USA

<sup>3</sup>Graduate School of Biomedical Sciences, Icahn School of Medicine at Mount Sinai,  
New York, NY USA

<sup>4</sup>Department of Pathology, Icahn School of Medicine at Mount Sinai, New York, NY USA

<sup>5</sup>Department of Neuroscience, Icahn School of Medicine at Mount Sinai, New York, NY USA

\*Corresponding author:

Alan C. Seifert:

E-mail: [alan.seifert@mssm.edu](mailto:alan.seifert@mssm.edu)

Address: One Gustave L. Levy Place  
Box 1234

New York, NY 10029

Phone: 212-824-8491

Fax: 646-537-9589

Running Title: Fixation Biases Myelin MRI

**Submitted to: Magnetic Resonance in Medicine**

Submission Type: Full Paper

Word Count: 4998 excluding tables, legends, headings, acknowledgements, reference citations,  
and references (Abstract: 240, limit: 250)

Disclosures: All authors state that they have no conflicts of interest.

Preliminary results from this manuscript have previously been presented in the following  
conference abstracts: ISMRM 2017 Abstract #2578, and ISMRM 2018 Abstract #322.

# Abstract

**Purpose:** Chemical fixatives, such as formalin, form cross-links between proteins and affect the relaxation times and diffusion properties of tissue. These fixation-induced changes likely also affect myelin density measurements produced by quantitative magnetization transfer (qMT) and myelin water imaging (MWI). In this work, we evaluate these myelin-sensitive MRI methods for fixation-induced biases.

**Methods:** We perform qMT, MWI, and D<sub>2</sub>O-exchanged zero echo-time (ZTE) imaging on unfixed human spinal cord tissue, and repeat these measurements after 1 day and 31 days of formalin fixation.

**Results:** The qMT bound pool fraction increased by 30.7±21.1% after 1 day of fixation and by 42.6±33.9% after 31 days of fixation. Myelin water fraction increased by 39.7±15.5% and 37.0±15.9% at these same time points, and mean T<sub>2</sub> of the myelin water pool nearly doubled. Reference-normalized D<sub>2</sub>O-exchanged ZTE signal intensity increased by 8.17±6.03% after 31 days of fixation, but did not change significantly after 1 day of fixation. After fixation, specimen cross-sectional area decreased by approximately 5%; after correction for shrinkage, changes in D<sub>2</sub>O-exchanged ZTE intensity were nearly eliminated.

**Conclusion:** F and MWF are significantly increased by formalin fixation, while D<sub>2</sub>O-exchanged ZTE intensity is minimally affected. Changes in qMT and MWI may be due, in part, to delamination and formation of vacuoles in the myelin sheath. D<sub>2</sub>O-exchanged signal intensity may be altered by fixation-induced changes in myelin lipid solid-state <sup>1</sup>H T<sub>1</sub>. We urge caution in the comparison of these measurements across subjects or specimens in different states, especially unfixed vs. fixed tissue.

# Key Words

Myelin, MRI, quantitative magnetization transfer (qMT), myelin water imaging (MWI), zero echo-time (ZTE) imaging, formalin fixation.

# Introduction

Myelin is a biomaterial that ensheathes nerve axons, thus enhancing the fidelity and conduction speed of action potentials (1). Quantification of central nervous system myelin content has important applications to demyelinating diseases, such as characterizing demyelination and monitoring remyelination. Two widely accepted MRI methods for myelin quantification are quantitative magnetization transfer (qMT) and myelin water imaging (MWI).

Magnetization transfer (MT) exploits the exchange of magnetization between  $^1\text{H}$  sites on macromolecules, termed the bound pool, that cannot be directly observed by standard pulse sequences due to their broad NMR lineshape, and water  $^1\text{H}$ , which can be readily observed. To measure the MT effect, the longitudinal magnetization of the bound pool is first saturated by off-resonance radiofrequency (RF) irradiation, then allowed to exchange with water  $^1\text{H}$ , and the decrease in water  $^1\text{H}$  signal after this MT preparation is measured (2). Quantitative MT involves the acquisition of data at many different RF irradiation frequency offsets and amplitudes, and the fitting of these data to a signal model (3,4). This model yields the fractional size of the bound pool ( $F$ ), a surrogate measure of myelin density.

Myelin water imaging discriminates between water inside the axons and in the extracellular space, and water occupying the confined spaces between layers of myelin. The latter, termed myelin water, has a shorter transverse relaxation time ( $T_2$ ) than intra/extracellular water due to its confinement by and interaction with the myelin bilayer surfaces (5,6). In MWI, the total water signal is excited and rapidly refocused by a train of  $180^\circ$  RF pulses, and the echoes occurring between refocusing pulses are acquired. The signal intensities in the echo-train are fitted to a sum of decaying exponential functions, with appropriate regularization, to extract the decay time constants and fractional sizes of the identifiable water pools. The portion of total signal with short  $T_2$  is assumed to arise from myelin water, while the portion with longer  $T_2$  is assumed to arise from intra/extracellular water (7). The fractional size of the short- $T_2$  pool is therefore termed the myelin water fraction (MWF), another surrogate measure of myelin density.

Both qMT and MWI are relatively straightforward to implement on standard scanner hardware. Over the last decade, several *ex vivo* studies have validated their sensitivity to myelination (8-14). Consequently, both methods are widely accepted as imaging biomarkers of myelination. They are, however, indirect methods of myelin quantification, in that they interrogate the interaction of water with myelin, rather than exciting and acquiring  $^1\text{H}$  signal from myelin itself. This indirect nature means that care must be taken to anticipate and account for differences in the interaction of myelin and water that arise from factors other than the density of myelin. Most

histologically validation studies of *ex vivo* qMT (8-10) and MWI (11-14) were performed on fixed tissue samples. Chemical fixatives, such as formalin, form cross-links between proteins (15-17), which decreases the longitudinal relaxation time ( $T_1$ ) and  $T_2$  of tissue water (18-21) and enhances the magnetization transfer effect (22-24). These fixation-induced changes likely bias the myelin density measurements produced by qMT and MWI (25).

Solid-state MRI methods, including zero echo-time (ZTE) (26,27) and ultra-short echo time (UTE) (28-30), are emerging techniques that have the potential to directly image and quantify the short-lived  $^1\text{H}$  signal arising from myelin lipids (31-34). The very presence of tissue water, however, is a significant impediment to quantification. Solid-state MRI enables the detection of myelin  $^1\text{H}$  signal, but does not confer specificity to this signal; water  $^1\text{H}$  signal is also acquired. To perform accurate quantification of myelin density *in vivo*, water  $^1\text{H}$  signal must be excluded from measurement. Possible methods under investigation include adiabatic inversion recovery and dual-echo subtraction (32,33,35). In contrast to indirect methods, myelin density quantification by water-suppressed solid-state MRI should be unaffected by fixation-induced changes in the interaction between myelin and water.

Another method to render solid-state MRI  $^1\text{H}$  signal highly specific to myelin is deuterium oxide ( $\text{D}_2\text{O}$ )-exchange, which replaces all exchangeable  $^1\text{H}$  nuclei with  $^2\text{H}$  (deuterium, D) nuclei.  $^2\text{H}$  are invisible on  $^1\text{H}$  MRI, leaving only non-exchangeable macromolecular  $^1\text{H}$  nuclei to be imaged (33,36).  $\text{D}_2\text{O}$ -exchange, however, is applicable only in *ex vivo* experiments.

In this work, we evaluated these myelin-sensitive MRI methods for fixation-induced biases. We performed qMT, MWI, and  $\text{D}_2\text{O}$ -exchanged ZTE on unfixed human spinal cord tissue, repeated these measurements after one day and 31 days of fixation by immersion in formalin, and quantified the changes in myelin density measurements induced by tissue fixation.

## Methods

### Specimens and Equipment

Seven 20-mm segments of unfixed, unfrozen human cervical spinal cord were obtained at autopsy from four donors with no demyelinating conditions and non-neurological cause of death. The interval between time of death and time of tissue harvest was less than 48 hours.

Each 20-mm segment was divided into two 10-mm segments, each having a volume of approximately 0.7 mL. One 10-mm segment underwent qMT and MWI, and the other underwent  $\text{D}_2\text{O}$ -exchanged ZTE imaging. The use of separate specimens is necessary to avoid

decomposition by minimizing the duration of the initial unfixed imaging experiment, which must be completed before initiation of fixation ( $D_2O$ -exchanged ZTE requires a particularly long preparation time). Specimens were stored in saline in sealed 20 mL glass scintillation vials at  $4^\circ\text{C}$  until time of imaging.

Imaging was performed on a 9.4 T Avance III HD micro-imaging system (Bruker, Billerica, MA) equipped with 1000 mT/m gradients and a 33-mm fixed-tune birdcage RF probe (Rapid Biomedical, Rimpf, Germany).

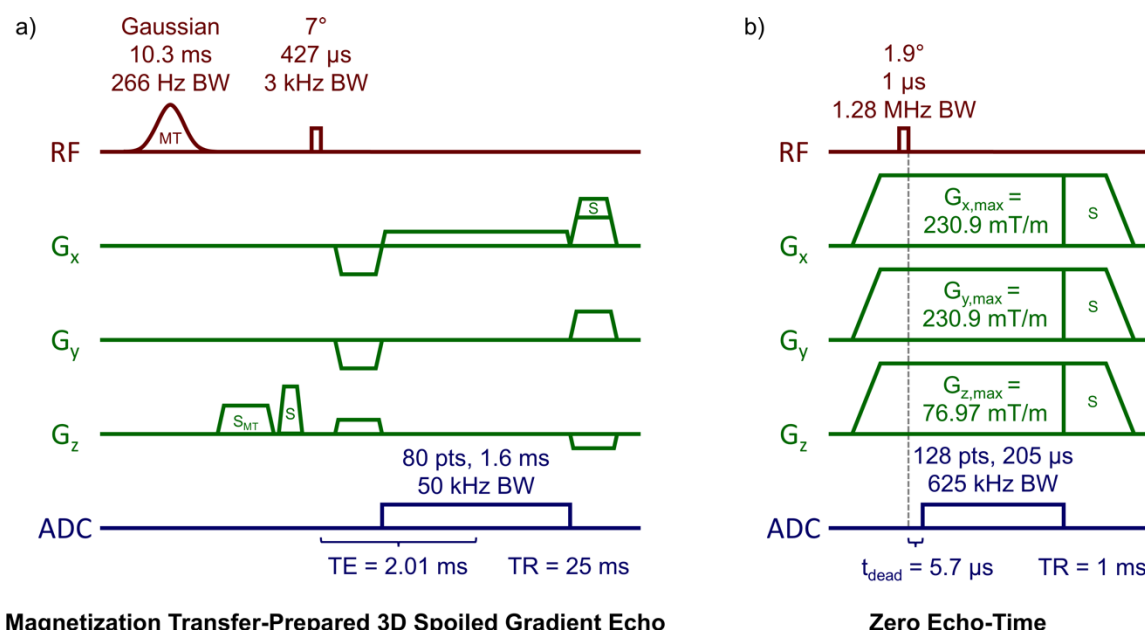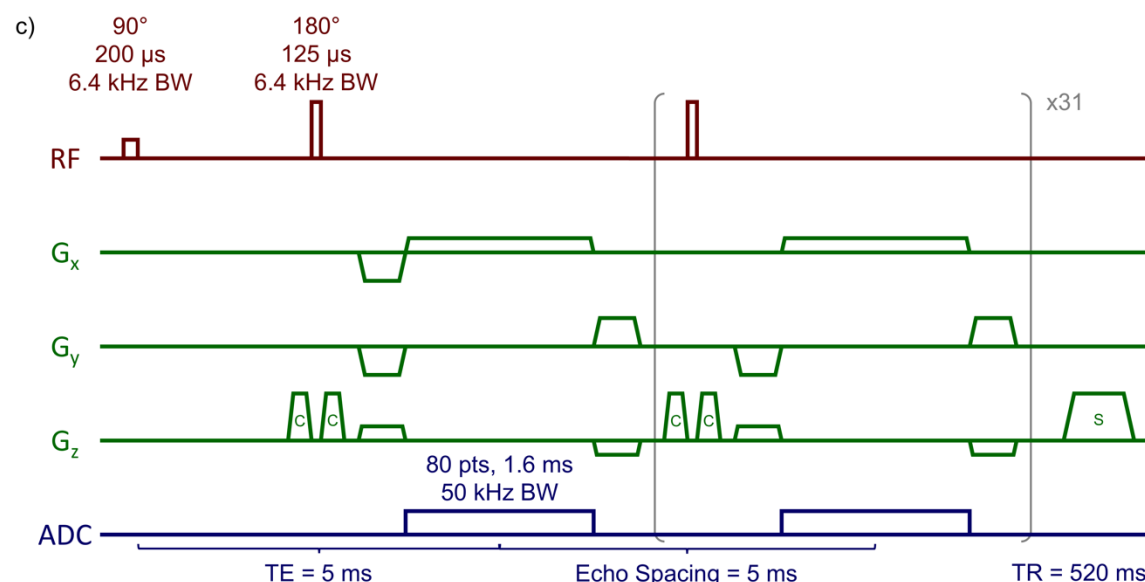

3D Multi-Echo Spin Echo

Figure 1: Diagrams and protocol parameters of (a) magnetization transfer (MT)-prepared 3D spoiled gradient echo, (b) zero echo-time, and (c) 3D multi-echo spin echo pulse sequences. Slice and read spoiler gradients are indicated by 'S', the MT-specific spoiler gradient by ' $S_{MT}$ ', and crusher gradients are indicated by 'C'.

Quantitative MT and MWI were performed in a single session in 20-mm glass NMR tubes at 25°C. The specimen was placed atop a 10-mm corrugated polyethylene spacer to support the 10-mm tissue specimen centrally within a 30-mm column of saline for sufficient static magnetic field ( $B_0$ ) homogeneity.  $B_0$  shimming was performed by at least three iterations of 3D  $B_0$  mapping and shim current calculation.

### Quantitative Magnetization Transfer

MT data were acquired using 61 applications of an MT-prepared 3D spoiled gradient-echo (MT-SPGR) sequence (4) with the following parameters: MT pulse shape = Gauss, MT pulse duration = 10.3 ms, MT pulse flip angles = 142° / 710° / 1388°, MT pulse bandwidth = 266.02 Hz, 20 MT pulse offsets log-spaced 234 Hz - 80 kHz, repetition time (TR) = 25 ms, excitation flip angle = 7°, excitation pulse duration = 427  $\mu$ s, excitation bandwidth = 3 kHz, echo time (TE) = 2.01 ms, 2 signal averages (16 for a single MT-off acquisition), field-of-view (FOV) = 20 x 20 x 40 mm<sup>3</sup>, resolution = 250 x 250 x 500  $\mu$ m<sup>3</sup>, and scan time = 6 hr 3 min.

$B_0$  mapping was performed using the product field mapping protocol, utilizing a dual-echo 3D SPGR sequence with the following parameters: TR = 50 ms, TEs = 1.755 and 5.326 ms (fat and water in phase), flip angle = 20°, 4 signal averages, FOV = 20 x 20 x 40 mm<sup>3</sup>, resolution = 250 x 250 x 500  $\mu$ m<sup>3</sup>, and scan time = 21 min 20 s.

Data were acquired for  $B_1$  mapping using six applications of a 2D SPGR sequence with the following parameters: TR = 10 s, TE = 2.54 ms, flip angle = 90°, 75°, 60°, 45°, 30°, 15°, 1 signal average each, 80 slices, slice thickness = 0.5 mm, FOV = 20 x 20 mm<sup>2</sup>, resolution = 250 x 250  $\mu$ m<sup>2</sup>, and scan time = 39 min 22 s. The resulting images were fitted voxel-wise to a sine function to derive the factor by which the measured flip angle deviates from the nominal flip angle for each voxel. These  $B_1$  maps were then smoothed with a 3D Gaussian filter with a standard deviation equal to the voxel resolution.

Data were acquired for  $T_1$  relaxometry using eight applications of a 2D spoiled gradient echo sequence with the following parameters: TRs = 4920, 3360, 2280, 1560, 1080, 720, 480, and 405 ms, TE = 2.54 ms, flip angle = 90°, 1 signal average each, 80 slices at slice thickness = 0.5

mm, FOV = 20 x 20 mm<sup>2</sup>, resolution = 250 x 250 μm<sup>2</sup>, and scan time = 19 min 46 s. The resulting images were fitted voxel-wise to the steady-state spoiled gradient echo signal equation to derive the  $R_1$  (i.e., inverse of  $T_1$  relaxation time) for each voxel.

Finally, MT data were fitted voxel-wise to a two-pool MT model using qMRILab (37). Additional fitting settings and parameters were: user-provided  $B_1$  and  $B_0$  maps,  $R_{1f}$  constrained by user-provided  $R_1$  map,  $R_{1r}$  equal to  $R_{1f}$ , model = SledPikeRP (4), lineshape = SuperLorentzian (38), and fitted parameters =  $F$ ,  $kr$ ,  $T_{2f}$ ,  $T_{2r}$ .  $F$  was taken as a surrogate measure of myelin density.

## Myelin Water Imaging

Myelin water imaging data were acquired using a custom 3D multi-echo spin echo sequence (remmiRARE, Vanderbilt University Institute of Imaging Science, Nashville, TN) (39) with the following parameters: TR = 520 ms, 32 echoes, echo spacing = 5 ms, non-selective RF excitation and refocusing pulses, excitation/refocusing pulse duration = 200/125 μs, pulse bandwidths = 6.4 kHz, constant amplitude crusher gradients, 4 signal averages, FOV = 20 x 20 x 40 mm<sup>3</sup>, and resolution = 250 x 250 x 500 μm<sup>3</sup>.

To produce  $T_2$  spectra, echo-train signals were fitted voxel-wise by non-negative least squares to an array of 100 extended phase graph-defined exponentials under both minimum-curvature (regularization weight = 0.002) (39,40) and two-Gaussian-pool (width = 5) (6,41) constraints using the MERA toolbox (42). Additional fitting settings and parameters were: time constants spaced logarithmically from 2.5 to 500 ms, and  $B_1$  fitting for non-ideal refocusing pulses in the range of 150° to 210° (43,44).

Fitted peaks in the resulting  $T_2$  spectrum with time constants <30 ms were labeled as myelin water, and peaks with time constants >30 ms were labeled as intra/extracellular water. MWF was calculated as the integral of peaks labeled as myelin water, divided by the integral of the entire  $T_2$  spectrum, and MWF was taken as a surrogate measure of myelin density. All MWFs and time constants reported henceforth are generated by averaging voxel-wise values within ROIs defined on the myelin water map (45), and are taken from two-Gaussian-pool fits unless otherwise noted. Conventional  $T_2$  maps were also produced by voxel-wise fitting to a single mono-exponential decay.

## Deuterium-Exchanged Zero Echo-Time Imaging

Each specimen was placed in a parafilm-sealed 20-mL glass vial containing 15 mL (>20-fold volume excess) of D<sub>2</sub>O-saline for 24 hours at 4°C for unfixed specimens or 25°C for fixed specimens, and changed to a second sealed tube containing 15 mL of fresh D<sub>2</sub>O-saline for



another 24 hours. This procedure results in >99.7% of H<sub>2</sub>O being exchanged for D<sub>2</sub>O (estimated as  $1 - (20 + 1)^{-2}$ , under the conservative assumption of 100% water density in the tissue). After D<sub>2</sub>O exchange, the specimen was placed in a parafilm-sealed 20-mL glass scintillation vial containing 15 mL of fresh D<sub>2</sub>O-saline, next to a 10-mm cubic piece of rubber (Hi-Polymer Eraser, Pentel, Torrance, CA), which served as a solid-state intensity reference. Localizer SPGR images (TE = 4 ms) were examined to ensure that no residual water <sup>1</sup>H signal was observable in the spinal cord specimen.

Imaging was then performed at 25°C using the Bruker product ZTE pulse sequence with the following parameters: TR = 1 ms, flip angle = 2.1°, pulse duration = 1 μs, excitation BW = 1.28 MHz, transmit/receive dead time = 5.7 μs (3.56 dwells), dwell time = 1.6 μs, readout BW = 625 kHz, N = 128, readout duration = 204.8 μs, 206,742 projections (fully sampled), 16 signal averages,  $G_{x, \max} = G_{y, \max} = 231$  mT/m,  $G_{z, \max} = 77$  mT/m, FOV = 64 x 64 x 192 mm<sup>3</sup>, voxel resolution = 250 x 250 x 750 μm<sup>3</sup>, and scan time = 55 min 8 s. A large FOV was required to enclose all <sup>1</sup>H signal arising from the spinal cord, rubber intensity reference, and plastic RF coil structure.

ZTE image intensity, normalized to the intensity in the rubber reference sample, was taken as a quantity reflecting myelin density.

## **Tissue Fixation**

After pre-fixation scanning, specimens were placed in 20 mL of 10% neutral buffered formalin for 24 hours, then rinsed by serial immersion in three 20-mL volumes of saline for 24 hours each to remove residual formalin. Specimens were scanned again using the same imaging protocols. Following the 1-day fixation scans, specimens were returned to a fresh 20 mL of 10% neutral buffered formalin for an additional 30 days, rinsed, and scanned again using the same protocols as the 1-day fixation scans.

## **Image Analysis**

Three ROIs were drawn in a central 2-mm slab in each specimen, enclosing the dorsal column (white matter, WM), both lateral columns (WM), and both ventral horns (gray matter, GM). A fourth ROI was drawn in D<sub>2</sub>O-exchanged ZTE images in the rubber reference. F, MWF, and ZTE image intensity (normalized to the rubber reference intensity) values were averaged within these ROIs. To measure tissue shrinkage during the process of chemical fixation, the cross-sectional area of each spinal cord specimen was manually quantified based on the multi-echo spin echo image or the ZTE image at each time point.



## Statistical Analysis

A total of 39 confirmatory hypothesis tests were performed. Thirty-six paired two-tailed t-tests were performed to compare measurements between each pair of time points for each of the three ROIs ( $n = 7$ ) and also encompassing all ROIs ( $n = 21$ ). Three linear regression analyses were performed to assess the correlation of measurements across the three myelin imaging methods at all time points and in all ROIs ( $n = 63$ ). The inclusion of specimen donor as a random effect decreased the model fitting quality, assessed by Akaike and Bayesian information criteria; fixed-effect linear regression was therefore used instead of mixed-effect linear regression. Statistical significance in confirmatory hypothesis tests was determined using a Bonferroni-corrected p-value threshold of  $1.28 \times 10^{-3}$  ( $= 0.05 / 39$ ).

Several exploratory analyses were also performed. To correct for tissue shrinkage, myelin density measurements (F, MWF by the two-Gaussian method, and reference-normalized ZTE intensity) at each post-fixation time point were multiplied by the ratio of the respective post-fixation to pre-fixation cross-sectional area. Exploratory paired two-tailed t-tests were then repeated between each pair of time points on these shrinkage-corrected values, as well as the  $T_2$  relaxation times of the myelin water and intra/extracellular water pools fitted by the two-Gaussian method, MWF by the minimum-curvature method, monoexponential  $T_1$  and  $T_2$  relaxation times, and cross-sectional areas. Exploratory linear regression analyses were performed among the three shrinkage-corrected myelin density measurements, and between MWF by the two-Gaussian and minimum-curvature methods.

## Exploratory Microscopy

To support a possible explanation of the results, illustrative microscopy images were acquired on rhesus macaque and human cervical spinal cord specimens.

Luxol fast blue-stained light microscopy images of a specimen of rhesus macaque cervical spinal cord were acquired at 400x magnification. The animal was euthanized and fixed by perfusion with a solution prepared from paraformaldehyde (PFA), then the specimen was post-fixed by immersion in formalin, and stored at 4°C for over 6 months. This work was performed under a protocol approved by the institution's IACUC.

Scanning electron microscopy images of a specimen of human cervical spinal cord were acquired at 3500x magnification. The tissue specimen was extracted at autopsy, fixed by immersion in formalin for over one year, sectioned, and post-fixed using  $\text{OsO}_4$ . This specimen was not one of the specimens studied using MRI. Additional electron microscopy parameters

were: acceleration voltage = 5000 V, emission current = 9000 nA, working distance = 23.2 mm, pixel resolution = 14.2 nm.

## Results

Representative MWI and qMT fitting results are shown in Figure 2. Differences in both MWF and F are visible as a larger area of the short- $T_2$  peak in Figure 2a-b and greater magnetization transfer saturation in Figure 2c-d, respectively.

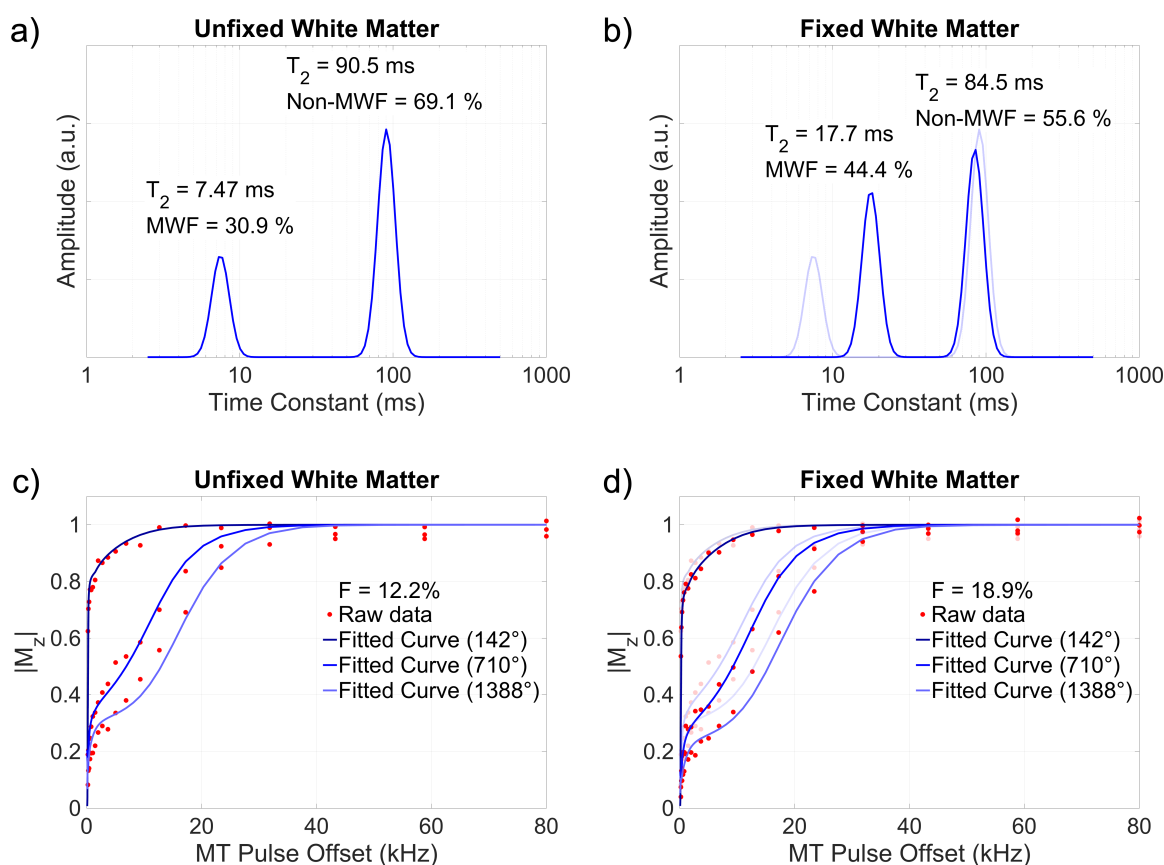

Figure 2: Myelin water imaging (a,b) and quantitative magnetization transfer (c,d) fitting results of a representative voxel within the dorsal white matter of an unfixed specimen (a,c) and after 31 days of fixation (b,d). After fixation, a greater fraction of total signal is identified as short- $T_2$  myelin water (b vs. a), and greater off-resonance saturation yields a larger fitted quantitative magnetization transfer bound pool fraction (d vs. c). The  $T_2$  of the myelin water pool is also markedly increased after fixation (b). Data from panels (a) and (c) are overlaid with reduced opacity on panels (b) and (d).

Parametric maps of relaxation times and myelin density measurements in a single pair of specimens at all three time points are shown in Figure 3.

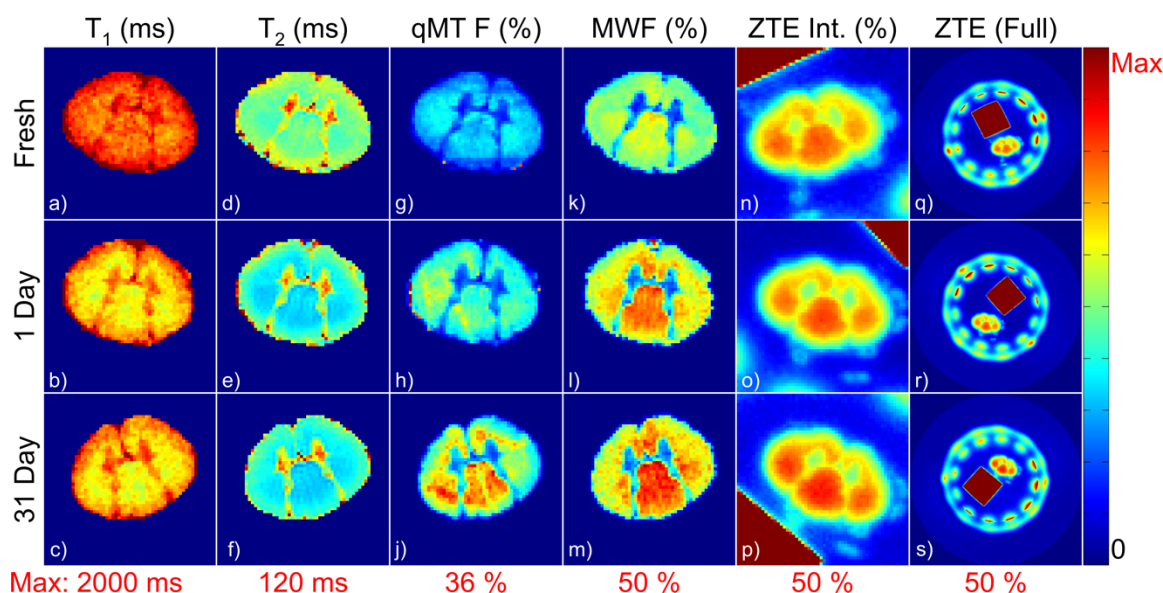

Figure 3: Representative parametric maps of relaxation times and myelin density measurements in an unfixed specimen and after 1 day and 31 days of fixation. All maps are displayed with the same color lookup table, scaled from 0 to the maximum value given in red below each column. The image artifact in the dorsal edge of (g) was due to Gibbs ringing in the through-slice direction arising from the plastic stage which supports the spinal cord. The ring of signal in the full-FOV ZTE images (q-s) arose from the plastic housing of the RF probe, and the high-intensity square was the rubber reference.

Changes in each of these measurements within each ROI are plotted in Figure 4a-c, and are tabulated along with summary statistics at each timepoint in Table 1. Across the three methods, F, MWF and reference-normalized D<sub>2</sub>O-exchanged ZTE signal intensity in the WM ROIs were consistently higher than those in the GM ROIs, as expected.

Considering both WM and GM ROIs ( $n = 21$ ), MWF increased rapidly in the first day of fixation, to  $39.7 \pm 15.5\%$ , and remained stable in the 31-day measurement at  $37.0 \pm 15.9\%$  greater than unfixed measurements. F, on the other hand, increased gradually over the full 31 days of fixation:  $30.7 \pm 21.0\%$  after 1 day of fixation, and  $42.6 \pm 33.9\%$  after 31 days. Reference-normalized D<sub>2</sub>O-exchanged ZTE signal intensities were least affected by fixation, with no significant change after 1 day of fixation and only a slight increase of  $8.17 \pm 6.03\%$  ( $n = 21$ ) after 31 days of fixation. Similar gradual increases were observed in both WM and GM.

In exploratory calculations, greater changes in F and MWF were observed in WM than in GM. After 1 day of fixation, F and MWF in WM ROIs ( $n = 14$ ) increased by similar proportions relative to unfixed measurements:  $40.1 \pm 13.4\%$ , and  $39.9 \pm 15.7\%$ , respectively. After 31 days of fixation, F in WM increased further to  $54.0 \pm 32.6\%$ , while MWF remained at  $42.4 \pm 14.4\%$ . MWF in GM increased by  $39.1 \pm 16.3\%$  after 1 day of fixation, and retreated to  $26.1 \pm 13.8\%$  after 31 days. Increases in F of  $12.0 \pm 21.7\%$  and  $19.7 \pm 24.9\%$  were observed after 1 and 31 days of fixation, respectively.

F and MWF measurements across all ROIs and timepoints ( $n = 63$ ) are strongly correlated, with  $R^2 = 0.77$  ( $p = 3 \times 10^{-21}$ ). Correlations of F and MWF with ZTE are  $R^2 = 0.47$  ( $p = 6 \times 10^{-10}$ ) and  $R^2 = 0.65$  ( $p = 2 \times 10^{-15}$ ), respectively. Scatter plots comparing among the three measurements are shown in Figure 4d-f.

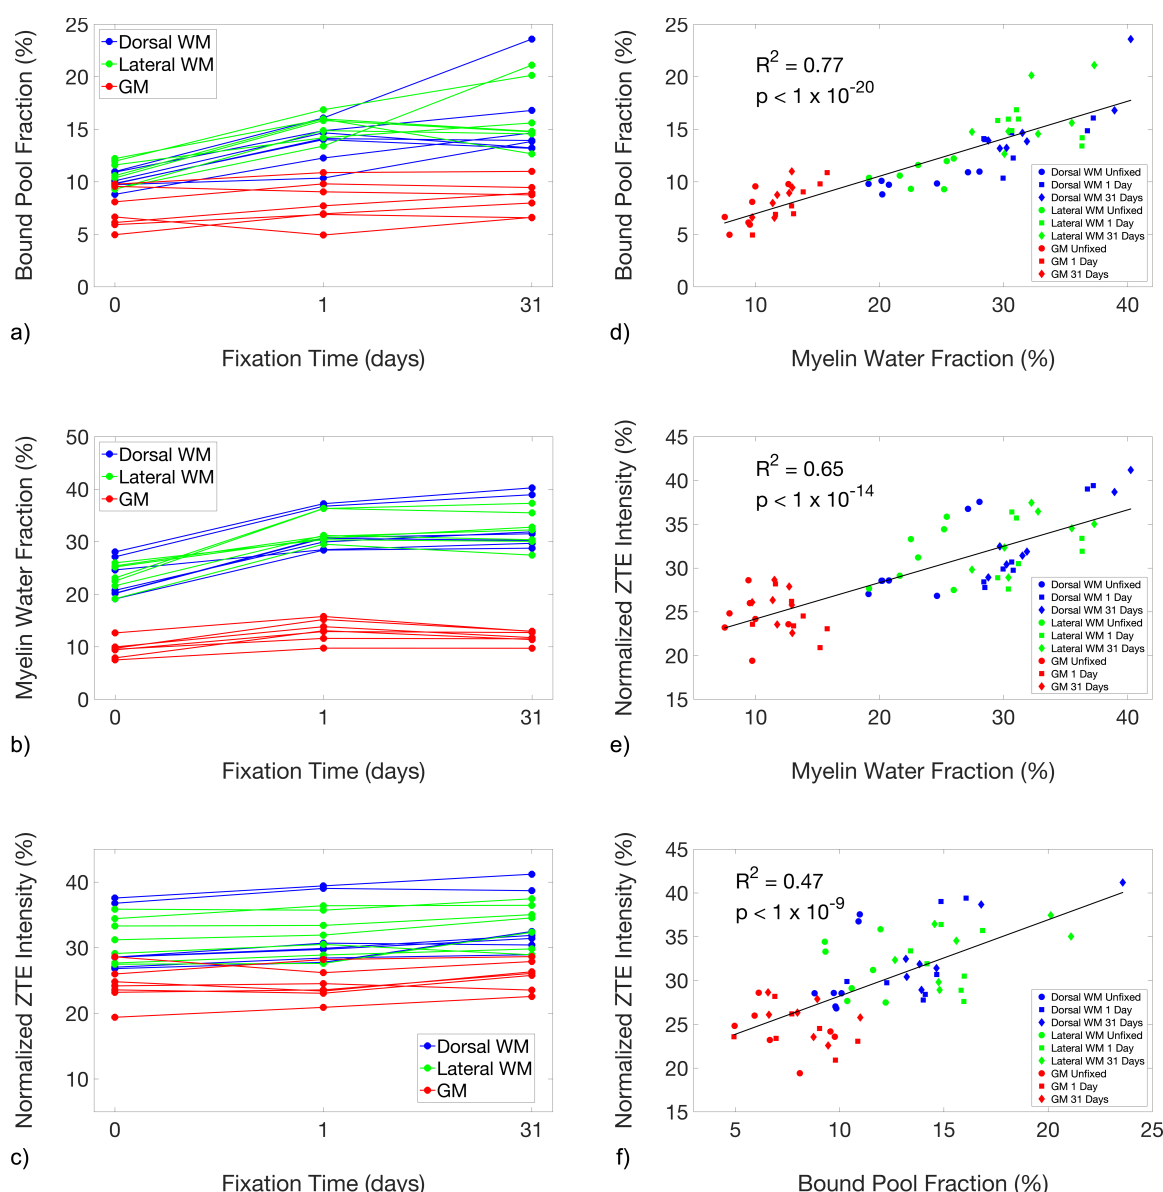

Figure 4: Line plots showing the changes in the quantitative magnetization transfer bound pool fraction (a), myelin water fraction (b), and reference-normalized D<sub>2</sub>O-exchanged ZTE signal intensity (c), of unfixed specimens and after 1 day and 31 days of fixation. Measurements produced by the three methods (d-f) were correlated. F and MWF were particularly strongly correlated (d), which suggests a common source of bias due to fixation between these two indirect measures that is not shared with D<sub>2</sub>O-exchanged ZTE.

| <b>Bound Pool Fraction at Experimental Time Points</b> |              |              |              |
|--------------------------------------------------------|--------------|--------------|--------------|
|                                                        | 0 days       | 1 day        | 31 days      |
| Dorsal WM                                              | 10.02 ± 0.75 | 13.76 ± 1.89 | 15.60 ± 3.73 |
| Lateral WM                                             | 10.76 ± 1.20 | 15.30 ± 1.20 | 16.23 ± 3.14 |
| GM                                                     | 7.30 ± 1.87  | 8.03 ± 2.02  | 8.47 ± 1.58  |

  

| <b>Myelin Water Fraction at Experimental Time Points</b> |              |              |              |
|----------------------------------------------------------|--------------|--------------|--------------|
|                                                          | 0 days       | 1 day        | 31 days      |
| Dorsal WM                                                | 22.86 ± 3.68 | 31.76 ± 3.70 | 33.05 ± 4.62 |
| Lateral WM                                               | 23.29 ± 2.45 | 32.21 ± 2.86 | 32.25 ± 3.36 |
| GM                                                       | 9.52 ± 1.67  | 13.16 ± 2.07 | 11.85 ± 1.16 |

  

| <b>ZTE Intensity at Experimental Time Points</b> |              |              |              |
|--------------------------------------------------|--------------|--------------|--------------|
|                                                  | 0 days       | 1 day        | 31 days      |
| Dorsal WM                                        | 30.55 ± 4.58 | 32.14 ± 4.94 | 33.57 ± 4.55 |
| Lateral WM                                       | 31.29 ± 3.35 | 32.06 ± 3.32 | 33.50 ± 3.26 |
| GM                                               | 24.25 ± 2.81 | 24.26 ± 2.35 | 25.83 ± 2.17 |

  

| <b>Changes in Bound Pool Fraction Over Time</b> |                                         |                                         |                                         |
|-------------------------------------------------|-----------------------------------------|-----------------------------------------|-----------------------------------------|
|                                                 | 0 days vs. 1 day                        | 1 day vs. 31 days                       | 0 days vs. 31 days                      |
| Dorsal WM                                       | 37.2 ± 14.0% ( $p = 5 \times 10^{-4}$ ) | 13.7 ± 21.7% ( $p = 2 \times 10^{-1}$ ) | 55.0 ± 29.1% ( $p = 4 \times 10^{-3}$ ) |
| Lateral WM                                      | 43.1 ± 13.1% ( $p = 4 \times 10^{-5}$ ) | 7.12 ± 25.7% ( $p = 5 \times 10^{-1}$ ) | 53.1 ± 38.1% ( $p = 7 \times 10^{-3}$ ) |
| GM                                              | 12.0 ± 21.7% ( $p = 2 \times 10^{-1}$ ) | 7.77 ± 14.5% ( $p = 2 \times 10^{-1}$ ) | 19.7 ± 24.9% ( $p = 7 \times 10^{-2}$ ) |
| All                                             | 30.7 ± 21.0% ( $p = 2 \times 10^{-6}$ ) | 9.53 ± 20.1% ( $p = 9 \times 10^{-2}$ ) | 42.6 ± 33.9% ( $p = 3 \times 10^{-5}$ ) |

  

| <b>Changes in Myelin Water Fraction Over Time</b> |                                         |                                          |                                         |
|---------------------------------------------------|-----------------------------------------|------------------------------------------|-----------------------------------------|
|                                                   | 0 days vs. 1 day                        | 1 day vs. 31 days                        | 0 days vs. 31 days                      |
| Dorsal WM                                         | 40.2 ± 13.3% ( $p = 5 \times 10^{-5}$ ) | 3.87 ± 3.30% ( $p = 3 \times 10^{-2}$ )  | 45.4 ± 11.9% ( $p = 3 \times 10^{-5}$ ) |
| Lateral WM                                        | 39.7 ± 19.0% ( $p = 8 \times 10^{-4}$ ) | 0.08 ± 4.70% ( $p = 9 \times 10^{-1}$ )  | 39.4 ± 16.9% ( $p = 6 \times 10^{-4}$ ) |
| GM                                                | 39.1 ± 16.3% ( $p = 3 \times 10^{-4}$ ) | -9.02 ± 7.86% ( $p = 3 \times 10^{-2}$ ) | 26.1 ± 13.8% ( $p = 2 \times 10^{-3}$ ) |
| All                                               | 39.7 ± 15.5% ( $p = 2 \times 10^{-8}$ ) | -1.69 ± 7.69% ( $p = 1$ )                | 37.0 ± 15.9% ( $p = 2 \times 10^{-7}$ ) |

  

| <b>Changes in ZTE Intensity Over Time</b> |                                         |                                         |                                         |
|-------------------------------------------|-----------------------------------------|-----------------------------------------|-----------------------------------------|
|                                           | 0 days vs. 1 day                        | 1 day vs. 31 days                       | 0 days vs. 31 days                      |
| Dorsal WM                                 | 5.16 ± 1.31% ( $p = 2 \times 10^{-4}$ ) | 4.81 ± 6.13% ( $p = 7 \times 10^{-2}$ ) | 10.2 ± 5.32% ( $p = 1 \times 10^{-3}$ ) |
| Lateral WM                                | 2.50 ± 2.48% ( $p = 4 \times 10^{-2}$ ) | 4.76 ± 6.94% ( $p = 1 \times 10^{-1}$ ) | 7.29 ± 5.75% ( $p = 1 \times 10^{-2}$ ) |
| GM                                        | 0.42 ± 6.38% ( $p = 1$ )                | 6.73 ± 6.03% ( $p = 3 \times 10^{-2}$ ) | 7.05 ± 7.26% ( $p = 4 \times 10^{-2}$ ) |
| All                                       | 2.69 ± 4.30% ( $p = 7 \times 10^{-3}$ ) | 5.43 ± 6.12% ( $p = 5 \times 10^{-4}$ ) | 8.17 ± 6.03% ( $p = 2 \times 10^{-6}$ ) |

Table 1: Mean ± standard deviation of myelin density measurements at each experimental time point, and changes in myelin density measurements between

imaging time points expressed as percent change relative to the pre-fixation measurement. Statistical significance in paired two-tailed t-tests was determined using a Bonferroni-corrected p-value threshold of  $1.28 \times 10^{-3}$ . Results not meeting this threshold are displayed in gray italic text. Note that comparisons in all ROIs contain  $n = 21$  pairs of data, while comparisons in any of the three ROIs contain  $n = 7$  pairs of data.

In exploratory analyses, the  $T_2$  of the myelin water pool across all WM ROIs (not including GM) in all specimens was  $8.49 \pm 0.97$  ms in unfixed tissue,  $14.5 \pm 1.81$  ms after 1 day of fixation (a  $73.0 \pm 28.5\%$  increase), and  $16.9 \pm 1.01$  ms after 31 days of fixation (a  $100 \pm 18.9\%$  increase). The  $T_2$  of the intra/extracellular water pool was  $87.2 \pm 6.23$  ms in unfixed WM,  $77.0 \pm 8.51$  ms after 1 day of fixation (an  $11.4 \pm 11.2\%$  decrease), and  $81.3 \pm 6.32$  ms after 31 days of fixation (a  $6.35 \pm 9.52\%$  decrease).

The cross-sectional areas of the spinal cords imaged by qMT and MWI ( $n = 7$ ) decreased by  $4.00 \pm 2.94\%$  after 1 day of fixation and  $4.45 \pm 8.55\%$  after 31 days of fixation, while the cross-sectional areas of the cords imaged by  $D_2O$ -exchanged ZTE ( $n = 7$ ) decreased by  $2.34 \pm 1.59\%$  after 1 day of fixation and  $4.84 \pm 1.25\%$  after 31 days of fixation. After correction for this tissue shrinkage and again considering all ROIs ( $n = 21$ ), F increased by  $25.6 \pm 20.9\%$  after 1 day of fixation and by  $37.0 \pm 37.7\%$  after 31 days of fixation; MWF increased by  $33.9 \pm 13.2\%$  after 1 day of fixation and  $31.2 \pm 20.8\%$  after 31 days of fixation. The change in the reference-normalized  $D_2O$ -exchanged ZTE signal intensity nearly disappeared after correction for shrinkage: it increased by  $0.30 \pm 4.70\%$  after 1 day of fixation and  $2.95 \pm 6.24\%$  after 31 days of fixation. These shrinkage-corrected measurements within each ROI are plotted in Supplemental Figure 1a-c, and changes in these measurements are tabulated in Supplemental Table 3.

## Discussion

We observed substantial increases in F and MWF after fixation, and a statistically significant but small increase in  $D_2O$ -exchanged ZTE signal intensity. The observed 54.0% increase in the F in WM from subjects without known neurodegenerative disorders is consistent with prior results. Schmierer et al. observed a 53% increase in F in normal appearing WM of brain tissue from subjects with multiple sclerosis, and 48% in multiple sclerosis lesions in the same tissues (23). Schmierer et al. also observed a 96% increase in F in the cortical GM of subjects with high cortical GM lesion load, and 49% in those with low cortical GM lesion load (24). These are



considerably larger increases than the 19.7% increase we observed in spinal cord GM. Both Schmierer's tissue samples and ours were sectioned and sufficient time was allowed for fixation, so inadequate fixative penetration was unlikely. The discrepancy may be due to differences in cellular composition (including myelinated axons in the GM) between the cortical GM sampled in Schmierer's study and spinal cord GM.

The observed 37.0% increase (all ROIs after 31 days of fixation) in MWF is also mostly consistent with prior reports. Recent results by Chen et al. are consistent with those reported here (46), and even suggest a possible mechanism for the observed increase in MWF. In an experiment where rat spinal cords were extracted following perfusion by phosphate-buffered saline, and then fixed by immersion in formaldehyde solution, Chen et al. observed an approximately 25% increase (from ~22% to ~27%) in MWF and an increase in the  $T_2$  relaxation time of the myelin water pool. Most interestingly, the increase in MWF was found to be due to an increase in the absolute size of the myelin water pool. This increase in MWF was not observed in spinal cords that were fixed by perfusion with paraformaldehyde solution at the time of sacrifice; these cords yielded MWF = ~30% after perfusion fixation, and the MWF did not increase further during immersion in fixative. Both Chen's results and our own may be explained by an expansion of the spaces between layers of the myelin sheath. These expanded spaces would contain a greater amount of water, and hence a greater fraction of the total water in the tissue. This myelin water would also have a longer  $T_2$ , due to decreased interaction with the lipid membranes in these expanded spaces. The expansion of the myelin water pool may also contribute to the observed increase in  $F$  by facilitating greater exchange between macromolecular and water  $^1\text{H}$  sites.

To illustrate this hypothesized expansion of spaces, we obtained light and electron microscopic images of formalin-fixed WM (Figure 5). Delaminated myelin sheaths were observed in isolated areas in both the electron (Fig. 5d-f) and light (Fig. 5k-m) microscopic images. Cohen-Adad et al. observed this same delamination in electron microscopic images (47).

Shatil et al. observed a nearly 150% increase in MWF in whole human brains fixed by immersion in formalin for approximately 40 days (25), but MWF was performed without first rinsing the fixative solution out of the tissue. The presence of formaldehyde decreases the  $T_1$  and  $T_2$  of tissue independently of its fixative effects, which may explain the much greater increase in MWF observed by Shatil et al.. Formaldehyde also diffuses slowly, needing approximately 3-5 weeks to penetrate and fix a whole brain specimen (19). The early changes in MWF observed by Shatil et al. may, therefore, be due to tissue decomposition, rather than

fixation. In the present work, the small size of the spinal cord specimens ensures that fixative can rapidly penetrate the entire specimen, but the effectiveness of the fixative in preserving the structure of the myelin sheath is uncertain.

Laule et al., however, observed similar MWFs in brain tissues from subjects with multiple sclerosis before and after 2 months of fixation by immersion in formalin (see Figure 1 in (13), showing similarly-sized myelin water peaks in unfixed and fixed tissue). The heterogeneity of published MWI results suggests that the increase in MWF is not a consequence of fixation in general, but rather a consequence of fixation methods that variably or unreliably stabilize the multilamellar structure of the myelin sheath. For example, glutaraldehyde-fixed surgical nerve specimens do not generally exhibit this delamination. Glutaraldehyde, having stronger fixative properties but a lower diffusion coefficient than formaldehyde (48,49), may be able to sufficiently stabilize the myelin sheath where formaldehyde cannot. This hypothesis should be investigated further in studies pairing MWI with validation by electron microscopy.

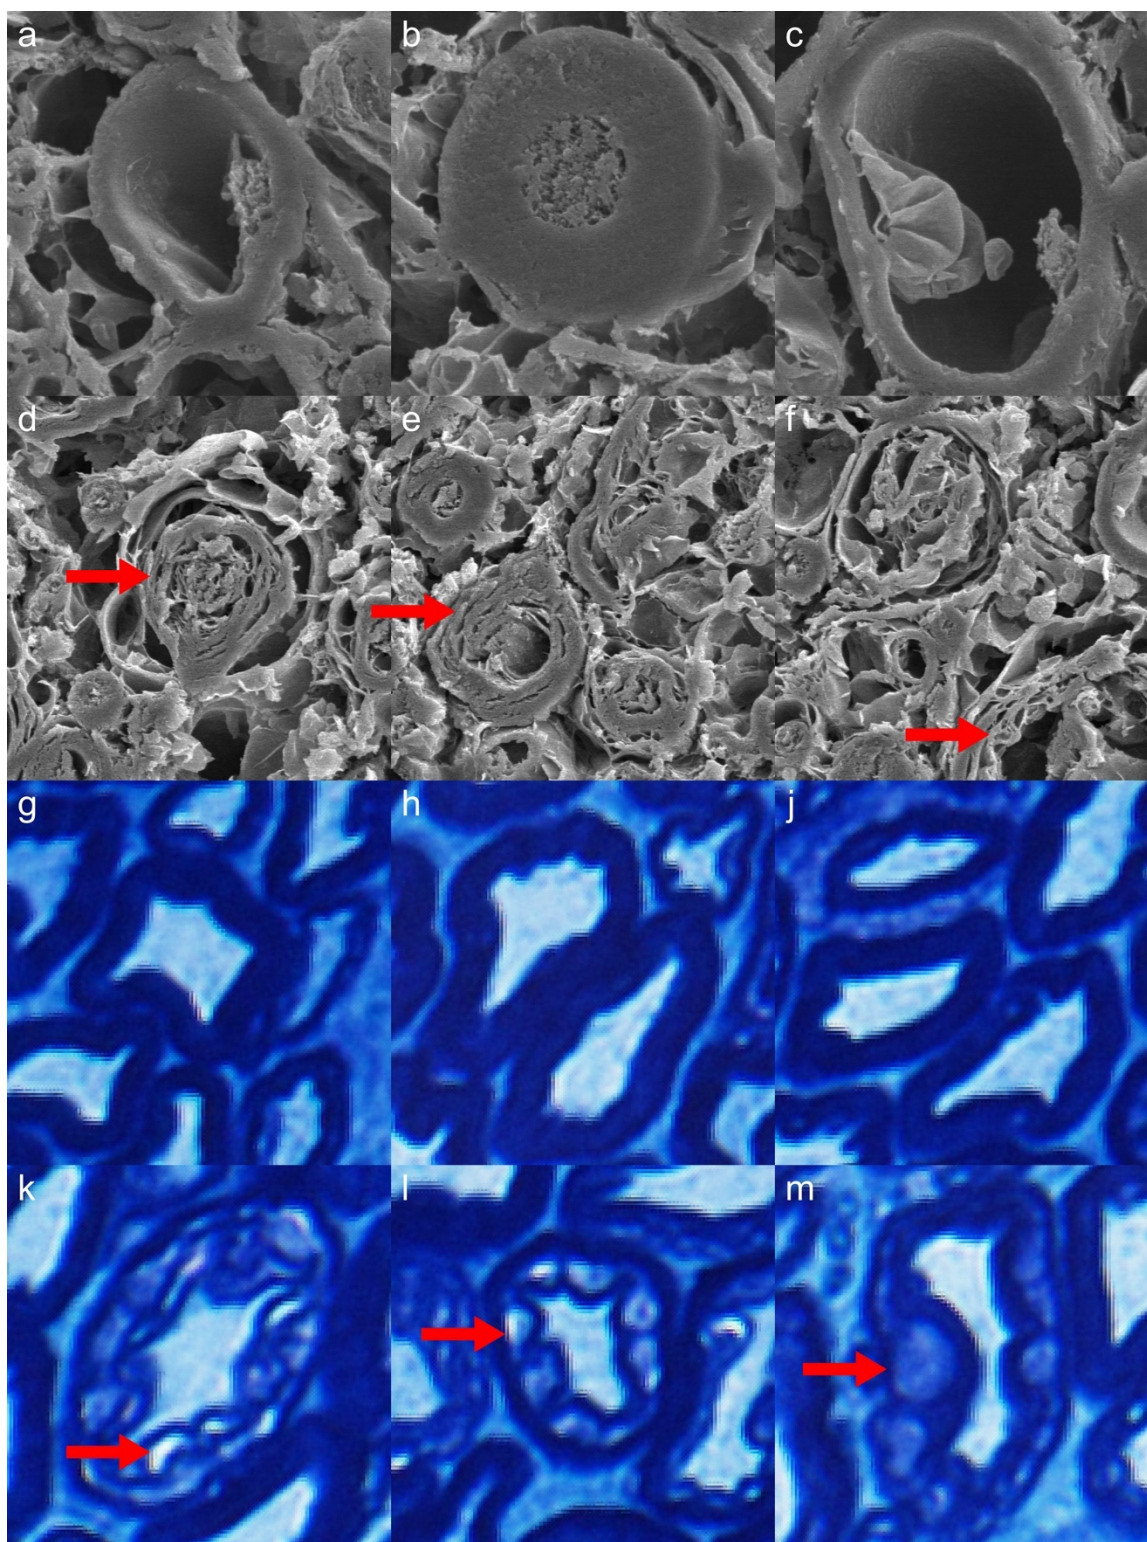

Figure 5: Electron microscopy (a-f) and Luxol fast blue-stained optical microscopy (g-m) images of myelinated axons from a rhesus macaque cervical spinal cord specimen fixed in formalin for 6 months. In the second (d-f) and fourth

(k-m) rows, vacuoles caused by inadequate fixation by immersion in formalin are indicated by red arrows. These vacuoles may be linked to the observed increases in F and MWF in fixed tissue, relative to tightly-wrapped myelin sheathes (a-c, g-j).

MWI assumes that myelin water and intra/extracellular water compartments exchange magnetization slowly, compared to the range of TEs sampled, so that inter-compartmental exchange can be neglected. As inter-compartmental exchange increases, the MWF and the myelin water pool  $T_2$  are both expected to decrease (50-52). Inversely, if the inter-compartmental exchange rate were to decrease, the MWF and myelin water pool  $T_2$  would be expected to increase. Shepherd, et al. (53), however, found that transmembrane (intracellular-to-extracellular) water exchange rates increase by over 200% with fixation in 4% formaldehyde solution. If exchange rates between the intra/extracellular pools and the myelin water pool also increase with fixation, this change, considered in isolation, would cause a decrease in MWF, which is not consistent with the present results. The likely changes in intercompartmental exchange rates induced by fixation requires further investigation.

Several different methods for regularization of multi-exponential relaxation analysis have been reported in the literature and are available in the MERA software package: minimum-curvature (39,40,52) and minimum-energy (7,14,54) constraints, which impose no assumptions on number of signal pools, and a multiple-Gaussian constraint (6,41), which does impose such an assumption. We applied two of these methods to our data: minimum-curvature and multiple (two)-Gaussian. Multi-exponential  $T_2$  analysis of central nervous system WM using methods that do not constrain the number of pools generally yield only two signal components (50,55). We therefore consider a two-pool constraint to be acceptable, and we favor this method for two reasons. First, we wished to be able to consider the relaxation times of the myelin water and intra/extracellular water in combination with MWF, and this would be aided by the surety that only two pools would be fitted to each voxel's signal. Second, after analyzing the data, we found that MWF maps produced by the two-Gaussian constraint were generally less noisy. Furthermore, MWF values averaged within ROIs drawn on voxel-wise MWF maps produced by these two regularization methods were strongly correlated:  $R^2 = 0.98$ ,  $p = 2 \times 10^{-51}$ .

The observed 8.17% increase (all ROIs after 31 days of fixation) in  $D_2O$ -exchanged ZTE intensity after formalin fixation appears both statistically and scientifically significant at first sight. However, tissue shrinkage is a well-known effect of formalin fixation (56,57). We observed decreases in cross-sectional area of  $4.64 \pm 5.88\%$ , corresponding to a reduction in volume



(assuming isotropic shrinkage) of 6.88% (-15.4% to +1.9%). Due to the high degree of structural anisotropy of myelin, isotropic shrinkage was judged to be an invalid assumption, so myelin density measurements were corrected for changes in cross-sectional area. Shrinkage-corrected D<sub>2</sub>O-exchanged ZTE intensity was found to change by only  $2.95 \pm 6.24\%$ . In a future study with a sufficiently large sample size, a statistically-significant increase in D<sub>2</sub>O-exchanged ZTE intensity may be found, but the increase may yet be deemed scientifically insignificant.

It is likely that the  $T_1$  and  $T_2^*$  relaxation times of myelin  $^1\text{H}$  signal are reduced by formalin fixation. Although the ZTE acquisition used a low flip angle (well below the Ernst angle) and was, therefore, proton-density weighted, a substantial decrease in  $T_1$  of myelin lipid  $^1\text{H}$  would nevertheless produce an increase in signal intensity. A decrease in  $T_2^*$  would instead result in reduced signal intensity, offsetting the effect of a decrease in  $T_1$ , as well as increased point-spread function blurring (already significant due to the extremely short  $T_2^*$  of  $\sim 120 \mu\text{s}$  (33), much shorter than the readout duration of  $204.8 \mu\text{s}$ ). It is also possible that additional non-exchangeable  $^1\text{H}$  sites are introduced by the process of formalin fixation. The predominant source of WM solid-state  $^1\text{H}$  signal is methylene bridges in myelin lipids (36). Formalin fixation results in the creation of cross-links between proteins. Each cross-link, coincidentally, contains one methylene bridge, which contains two methylene  $^1\text{H}$  nuclei that are detectable by D<sub>2</sub>O-exchanged ZTE.

It is unlikely that the observed increase in D<sub>2</sub>O-exchanged ZTE intensity after formalin fixation is due to differences in the completeness of D<sub>2</sub>O exchange between fresh and fixed specimens. Fresh specimens were D<sub>2</sub>O-exchanged at 4°C while fixed specimens were D<sub>2</sub>O-exchanged at room temperature. The higher temperature would result in an approximately 80% increase in the diffusivity of water (58), which would overwhelm the approximately 27% decrease in the diffusion coefficient of water in fixed WM relative to unfixed WM (23). Incomplete exchange, therefore, would be more likely in the unfixed specimens, and, if present, would instead produce a decrease in D<sub>2</sub>O-exchanged ZTE intensity after fixation. Furthermore, the completeness of D<sub>2</sub>O exchange was confirmed in every specimen at every time point by imaging with a standard SPGR pulse sequence. In these SPGR scans, no signal was observed in either the spinal cord specimen or the D<sub>2</sub>O-saline solution in which the specimen and rubber intensity reference were immersed.

Our relaxometry measurements are also consistent with prior reports. We observed a 15-18% decrease in  $T_1$  and a 23-25% decrease in  $T_2^*$  after fixation. Dawe et al. measured a 27% decrease in  $T_2^*$  in human brain hemispheres at 3 T after fixation by immersion in formaldehyde

solution (20). Raman et al. measured a ~33% decrease in  $T_1$  in the corpus callosum of human brain hemispheres at 3 T after 6 months of fixation by immersion in formaldehyde solution, and an approximately 15-20% decrease at one month (21).

The results presented here do not undermine the validity of F or MWF as biomarkers of myelin density in vivo or after any specific tissue preparation method. Prior work has thoroughly and convincingly proven the correspondence of these metrics to myelin concentration (8-14). In presenting these results, we instead urge caution in the comparison of measurements gained by these methods across differently-prepared specimens, especially unfixed vs. fixed specimens.

An important limitation of this study is the interval between death of the tissue donor and measurement of the pre-fixation imaging metrics. Although a strict limit of 48 hours was set between time of death and time of tissue harvest and imaging, tissue autolysis begins immediately after death, and significant changes in diffusion parameters were observed in the first three hours after death in pig brains stored at 4°C (59). Also, although D<sub>2</sub>O-exchanged ZTE signal intensity is minimally affected by formalin fixation, suppression of bulk tissue water by D<sub>2</sub>O exchange is not possible in vivo. Translation of this method to in vivo use will necessarily involve the refinement of methods to suppress tissue water by selective inversion-recovery or echo subtraction, both of which will be complicated by fixation-induced changes in the relaxation times of tissue water.

In conclusion, F and MWF are significantly increased by formalin fixation, while D<sub>2</sub>O-exchanged ZTE intensity is minimally affected.

## Acknowledgements

The authors gratefully acknowledge Kevin D. Harkins, Ph.D., of Vanderbilt University for providing the remmiRARE sequence, and for his assistance in modifying the protocol for ParaVision 6.0. Development of remmiRARE was supported by NIH R01-EB019980. The authors also thank Prof. Alex MacKay of the University of British Columbia for a helpful discussion on the interpretation of myelin water imaging results. This work was supported in part by NIH/NINDS K01-NS105160 and National Multiple Sclerosis Society grant PP-1705-27656. Portions of this work have previously been presented as ISMRM conference abstracts (60,61).

We are also grateful to Dr. Paula Croxson, Department of Neuroscience at Icahn School of Medicine at Mount Sinai (ISMMS) for providing the rhesus macaque spinal cord tissue; Dr. Joo-won Kim, Department of Radiology at ISMMS, for assisting with the extraction of the rhesus

495 macaque spinal cord; Mr. William Janssen, Department of Neuroscience at ISMMS, for  
496 performing the rhesus macaque perfusion and for providing the light microscopy images; and  
497 Dr. Ronald Gordon, Department of Pathology at ISMMS, for providing the electron microscopy  
498 images.



# References

1. van der Knaap MS, Valk J. Magnetic Resonance of Myelination and Myelin Disorders. Berlin, Heidelberg: Springer Berlin Heidelberg; 2005 pp. 1–19. doi: 10.1007/3-540-27660-2.
2. Wolff SD, Balaban RS. Magnetization transfer contrast (MTC) and tissue water proton relaxation in vivo. *Magn. Reson. Med.* 1989;10:135–144.
3. Henkelman RM, Huang X, Xiang QS, Stanisz GJ, Swanson SD, Bronskill MJ. Quantitative interpretation of magnetization transfer. *Magn. Reson. Med.* 1993;29:759–766.
4. Sled JG, Pike GB. Quantitative imaging of magnetization transfer exchange and relaxation properties in vivo using MRI. *Magn. Reson. Med.* 2001;46:923–931. doi: 10.1002/mrm.1278.
5. Mackay A, Whittall K, Adler J, Li D, Paty D, Graeb D. In vivo visualization of myelin water in brain by magnetic resonance. *Magn. Reson. Med.* 1994;31:673–677.
6. Stanisz GJ, Henkelman RM. Diffusional anisotropy of T2 components in bovine optic nerve. *Magn. Reson. Med.* 1998;40:405–410.
7. MacKay A, Laule C, Vavasour I, Bjarnason T, Kolind S, Madler B. Insights into brain microstructure from the T2 distribution. *Magnetic Resonance Imaging* 2006;24:515–525. doi: 10.1016/j.mri.2005.12.037.
8. Schmierer K, Tozer DJ, Scaravilli F, Altmann DR, Barker GJ, Tofts PS, Miller DH. Quantitative magnetization transfer imaging in postmortem multiple sclerosis brain. *J. Magn. Reson. Imaging* 2007;26:41–51. doi: 10.1002/jmri.20984.
9. Janve VA, Zu Z, Yao S-Y, Li K, Zhang FL, Wilson KJ, Ou X, Does MD, Subramaniam S, Gochberg DF. The radial diffusivity and magnetization transfer pool size ratio are sensitive markers for demyelination in a rat model of type III multiple sclerosis (MS) lesions. *NeuroImage* 2013;74:298–305. doi: 10.1016/j.neuroimage.2013.02.034.
10. Turati L, Moscatelli M, Mastropietro A, et al. In vivo quantitative magnetization transfer imaging correlates with histology during de- and remyelination in cuprizone-treated mice. *NMR Biomed.* 2015;28:327–337. doi: 10.1002/nbm.3253.
11. Chen HS-M, Holmes N, Liu J, Tetzlaff W, Kozlowski P. Validating myelin water imaging with transmission electron microscopy in a rat spinal cord injury model. *NeuroImage* 2017;153:122–130. doi: 10.1016/j.neuroimage.2017.03.065.

12. Odrobina EE, Lam TYJ, Pun T, Midha R, Stanisiz GJ. MR properties of excised neural tissue following experimentally induced demyelination. *NMR Biomed.* 2005;18:277–284. doi: 10.1002/nbm.951.
13. Laule C, Leung E, Lis DKB, Traboulsee AL, Paty DW, MacKay AL, Moore GRW. Myelin water imaging in multiple sclerosis: quantitative correlations with histopathology. *Mult. Scler.* 2006;12:747–753. doi: 10.1177/1352458506070928.
14. Laule C, Kozlowski P, Leung E, Li DKB, MacKay AL, Moore GRW. Myelin water imaging of multiple sclerosis at 7 T: correlations with histopathology. *NeuroImage* 2008;40:1575–1580. doi: 10.1016/j.neuroimage.2007.12.008.
15. Puchtler H, Meloan SN. On the chemistry of formaldehyde fixation and its effects on immunohistochemical reactions. *Histochemistry* 1985;82:201–204.
16. Metz B, Kersten GFA, Hoogerhout P, et al. Identification of formaldehyde-induced modifications in proteins: reactions with model peptides. *J Biol Chem* 2004;279:6235–6243. doi: 10.1074/jbc.M310752200.
17. Thavarajah R, Mudimbaimannar VK, Elizabeth J, Rao UK, Ranganathan K. Chemical and physical basics of routine formaldehyde fixation. *J Oral Maxillofac Pathol* 2012;16:400–405. doi: 10.4103/0973-029X.102496.
18. Carvlin MJ, Asato R, Hackney DB, Kassab E, Joseph PM. High-resolution MR of the spinal cord in humans and rats. *American Journal of Neuroradiology* 1989;10:13–17.
19. Blamire AM, Rowe JG, Styles P, McDonald B. Optimising imaging parameters for post mortem MR imaging of the human brain. *Acta Radiol* 1999;40:593–597.
20. Dawe RJ, Bennett DA, Schneider JA, Vasireddi SK, Arfanakis K. Postmortem MRI of human brain hemispheres: T2 relaxation times during formaldehyde fixation. *Magn. Reson. Med.* 2009;61:810–818. doi: 10.1002/mrm.21909.
21. Raman MR, Shu Y, Lesnick TG, Jack CR, Kantarci K. Regional T1 relaxation time constants in Ex vivo human brain: Longitudinal effects of formalin exposure. *Magn. Reson. Med.* 2017;77:774–778. doi: 10.1002/mrm.26140.
22. Fishbein KW, Gluzband YA, Kaku M, Ambia-Sobhan H, Shapses SA, Yamauchi M, Spencer RG. Effects of formalin fixation and collagen cross-linking on T2 and magnetization transfer in bovine nasal cartilage. *Magn. Reson. Med.* 2007;57:1000–1011. doi: 10.1002/mrm.21216.

- 558 23. Schmierer K, Wheeler-Kingshott CAM, Tozer DJ, Boulby PA, Parkes HG, Yousry TA,  
559 Scaravilli F, Barker GJ, Tofts PS, Miller DH. Quantitative magnetic resonance of postmortem  
560 multiple sclerosis brain before and after fixation. *Magn. Reson. Med.* 2008;59:268–277. doi:  
561 10.1002/mrm.21487.
- 562 24. Schmierer K, Thavarajah JR, An SF, Brandner S, Miller DH, Tozer DJ. Effects of formalin  
563 fixation on magnetic resonance indices in multiple sclerosis cortical gray matter. *J. Magn.*  
564 *Reson. Imaging* 2010;32:1054–1060. doi: 10.1002/jmri.22381.
- 565 25. Shatil AS, Uddin MN, Matsuda KM, Figley CR. Quantitative Ex Vivo MRI Changes due to  
566 Progressive Formalin Fixation in Whole Human Brain Specimens: Longitudinal Characterization  
567 of Diffusion, Relaxometry, and Myelin Water Fraction Measurements at 3T. *Front Med*  
568 (Lausanne) 2018;5:31. doi: 10.3389/fmed.2018.00031.
- 569 26. Wu YT, Chesler DA, Glimcher MJ, Garrido L, Wang JX, Jiang HJ, Ackerman JL.  
570 Multinuclear solid-state three-dimensional MRI of bone and synthetic calcium phosphates. *Proc.*  
571 *Natl. Acad. Sci. U.S.A.* 1999;96:1574–1578. doi: 10.1073/pnas.96.4.1574.
- 572 27. Weiger M, Brunner DO, Dietrich BE, Müller CF, Pruessmann KP. ZTE imaging in humans.  
573 *Magn. Reson. Med.* 2013;70:328–332. doi: 10.1002/mrm.24816.
- 574 28. Glover GH, Pauly JM, Bradshaw KM. B-11 Imaging with a 3-Dimensional Reconstruction  
575 Method. *J. Magn. Reson. Imaging* 1992;2:47–52.
- 576 29. Robson MD, Gatehouse PD, Bydder M, Bydder GM. Magnetic resonance: An introduction to  
577 ultrashort TE (UTE) imaging. *J Comput Assist Tomogr* 2003;27:825–846. doi:  
578 10.1097/00004728-200311000-00001.
- 579 30. Waldman A, Rees JH, Brock CS, Robson MD, Gatehouse PD, Bydder GM. MRI of the brain  
580 with ultra-short echo-time pulse sequences. *Neuroradiology* 2003;45:887–892. doi:  
581 10.1007/s00234-003-1076-z.
- 582 31. Du J, Ma G, Li S, Carl M, Szeverenyi NM, VandenBerg S, Corey-Bloom J, Bydder GM.  
583 Ultrashort echo time (UTE) magnetic resonance imaging of the short T2 components in white  
584 matter of the brain using a clinical 3T scanner. *NeuroImage* 2014;87:32–41. doi:  
585 10.1016/j.neuroimage.2013.10.053.
- 586 32. Wilhelm MJ, Ong HH, Wehrli SL, Li C, Tsai P-H, Hackney DB, Wehrli FW. Direct magnetic  
587 resonance detection of myelin and prospects for quantitative imaging of myelin density. *Proc.*  
588 *Natl. Acad. Sci. U.S.A.* 2012;109:9605–9610. doi: 10.1073/pnas.1115107109.

589 33. Seifert AC, Li C, Wilhelm MJ, Wehrli SL, Wehrli FW. Towards quantification of myelin by  
590 solid-state MRI of the lipid matrix protons. *NeuroImage* 2017;163:358–367. doi:  
591 10.1016/j.neuroimage.2017.09.054.

592 34. Sheth V, Shao H, Chen J, VandenBerg S, Corey-Bloom J, Bydder GM, Du J. Magnetic  
593 resonance imaging of myelin using ultrashort Echo time (UTE) pulse sequences: Phantom,  
594 specimen, volunteer and multiple sclerosis patient studies. *NeuroImage* 2016;136:37–44. doi:  
595 10.1016/j.neuroimage.2016.05.012.

596 35. Du J, Takahashi AM, Bae WC, Chung CB, Bydder GM. Dual inversion recovery, ultrashort  
597 echo time (DIR UTE) imaging: Creating high contrast for short- T2species. *Magn. Reson. Med.*  
598 2010;63:447–455. doi: 10.1002/mrm.22257.

599 36. Horch RA, Gore JC, Does MD. Origins of the ultrashort-T21H NMR signals in myelinated  
600 nerve: A direct measure of myelin content? *Magn. Reson. Med.* 2011;66:24–31. doi:  
601 10.1002/mrm.22980.

602 37. Cabana J-F, Gu Y, Boudreau M, et al. Quantitative magnetization transfer imaging  
603 madeeasy with qMTL ab: Software for data simulation, analysis, and visualization. *Concepts*  
604 *Magn. Reson.* 2016;44A:263–277. doi: 10.1002/cmr.a.21357.

605 38. Wennerström H. Proton nuclear magnetic resonance lineshapes in lamellar liquid crystals.  
606 *Chem Phys Lett* 1973;18:41–44. doi: 10.1016/0009-2614(73)80333-1.

607 39. West KL, Kelm ND, Carson RP, Gochberg DF, Ess KC, Does MD. Myelin volume fraction  
608 imaging with MRI. *NeuroImage* 2016. doi: 10.1016/j.neuroimage.2016.12.067.

609 40. Whittall KP, MacKay AL. Quantitative interpretation of NMR relaxation data. *Journal of*  
610 *Magnetic Resonance* (1969) 1989;84:134–152. doi: 10.1016/0022-2364(89)90011-5.

611 41. Harkins KD, Valentine WM, Gochberg DF, Does MD. In-vivo multi-exponential T2,  
612 magnetization transfer and quantitative histology in a rat model of intramyelinic edema.  
613 *Neuroimage Clin* 2013;2:810–817. doi: 10.1016/j.nicl.2013.06.007.

614 42. Does MD. Multi-Exponential Relaxation Analysis (MERA) Toolbox.  
615 [https://vuiis.vumc.org/~doesmd/MERA/MERA\\_Toolbox.html](https://vuiis.vumc.org/~doesmd/MERA/MERA_Toolbox.html).

616 43. Lebel RM, Wilman AH. Transverse relaxometry with stimulated echo compensation. *Magn.*  
617 *Reson. Med.* 2010;64:1005–1014. doi: 10.1002/mrm.22487.

44. Prasloski T, Mädler B, Xiang Q-S, MacKay A, Jones C. Applications of stimulated echo correction to multicomponent T2 analysis. *Magn. Reson. Med.* 2012;67:1803–1814. doi: 10.1002/mrm.23157.
45. Meyers SM, Laule C, Vavasour IM, Kolind SH, Mädler B, Tam R, Traboulsee AL, Lee J, Li DKB, MacKay AL. Reproducibility of myelin water fraction analysis: a comparison of region of interest and voxel-based analysis methods. *Magnetic Resonance Imaging* 2009;27:1096–1103. doi: 10.1016/j.mri.2009.02.001.
46. Chen HS-M, Liu J, MacKay AL, Tetzlaff W, Kozlowski P. Effect of Aldehyde Fixation on the Myelin Water Fraction Measurement in Rat Cervical Spinal Cord. In: *Proceedings of the International Society for Magnetic Resonance in Medicine, Paris, France; Abstract 1852; 2018.*
47. Cohen-Adad J. Microstructural imaging in the spinal cord and validation strategies. *NeuroImage* 2018;182:169–183. doi: 10.1016/j.neuroimage.2018.04.009.
48. Sabatini DD. CYTOCHEMISTRY AND ELECTRON MICROSCOPY: The Preservation of Cellular Ultrastructure and Enzymatic Activity by Aldehyde Fixation. *The Journal of Cell Biology* 1963;17:19–58. doi: 10.1083/jcb.17.1.19.
49. Kiernan JA. Formaldehyde, Formalin, Paraformaldehyde And Glutaraldehyde: What They Are And What They Do. *Microsc. Today* 2018;8:8–13. doi: 10.1017/S1551929500057060.
50. Dula AN, Gochberg DF, Valentine HL, Valentine WM, Does MD. Multiexponential T2, magnetization transfer, and quantitative histology in white matter tracts of rat spinal cord. *Magn. Reson. Med.* 2010;63:902–909. doi: 10.1002/mrm.22267.
51. Does MD. Inferring brain tissue composition and microstructure via MR relaxometry. *NeuroImage* 2018. doi: 10.1016/j.neuroimage.2017.12.087.
52. Harkins KD, Dula AN, Does MD. Effect of intercompartmental water exchange on the apparent myelin water fraction in multiexponential T2 measurements of rat spinal cord. *Magn. Reson. Med.* 2012;67:793–800. doi: 10.1002/mrm.23053.
53. Shepherd TM, Thelwall PE, Stanis GJ, Blackband SJ. Aldehyde fixative solutions alter the water relaxation and diffusion properties of nervous tissue. *Magn. Reson. Med.* 2009;62:26–34. doi: 10.1002/mrm.21977.
54. Levesque IR, Giacomini PS, Narayanan S, Ribeiro LT, Sled JG, Arnold DL, Pike GB. Quantitative magnetization transfer and myelin water imaging of the evolution of acute multiple sclerosis lesions. *Magn. Reson. Med.* 2010;63:633–640. doi: 10.1002/mrm.22244.

649 55. Kozlowski P, Liu J, Yung AC, Tetzlaff W. High-resolution myelin water measurements in rat  
650 spinal cord. *Magn. Reson. Med.* 2008;59:796–802. doi: 10.1002/mrm.21527.

651 56. Jonmarker S, Valdman A, Lindberg A, Hellström M, Egevad L. Tissue shrinkage after  
652 fixation with formalin injection of prostatectomy specimens. *Virchows Arch.* 2006;449:297–301.  
653 doi: 10.1007/s00428-006-0259-5.

654 57. Tran T, Sundaram CP, Bahler CD, Eble JN, Grignon DJ, Monn MF, Simper NB, Cheng L.  
655 Correcting the Shrinkage Effects of Formalin Fixation and Tissue Processing for Renal Tumors:  
656 toward Standardization of Pathological Reporting of Tumor Size. *J Cancer* 2015;6:759–766. doi:  
657 10.7150/jca.12094.

658 58. Harris KR, Woolf LA. Pressure and temperature dependence of the self diffusion coefficient  
659 of water and oxygen-18 water. *J. Chem. Soc., Faraday Trans. 1* 1980;76:377. doi:  
660 10.1039/f19807600377.

661 59. Widjaja E, Wei X, Vidarsson L, Moineddin R, Macgowan CK, Nilsson D. Alteration of  
662 diffusion tensor parameters in postmortem brain. *Magnetic Resonance Imaging* 2009;27:865–  
663 870. doi: 10.1016/j.mri.2008.11.009.

664 60. Seifert AC, Hefti M, Fowkes M, Xu J. Myelin Density Measurement by ZTE in the D2O-  
665 Exchanged Spinal Cord is Unaffected by Tissue Fixation. In: *Proceedings of the International*  
666 *Society for Magnetic Resonance in Medicine, Honolulu, HI, USA; Abstract 2578; 2017.*

667 61. Seifert AC, Umphlett M, Fowkes M, Xu J. Formalin Tissue Fixation Biases Myelin Density  
668 Measurements by Quantitative Magnetization Transfer and Myelin Water Imaging. In:  
669 *Proceedings of the International Society for Magnetic Resonance in Medicine, Paris, France;*  
670 *Abstract 322; 2018.*
